# Supplementary material
Source: PubMed Central journal article supplement (PMC3594652)

Huang\_Fig. S1

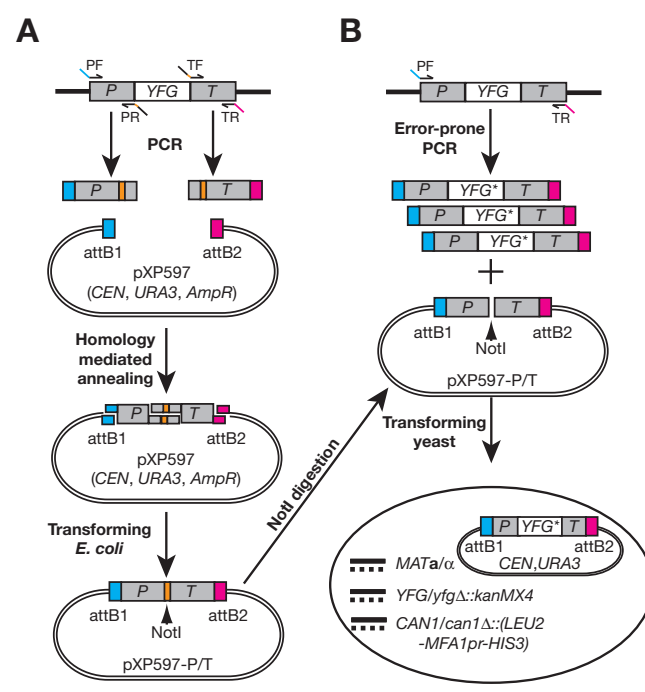

Huang\_Fig. S2

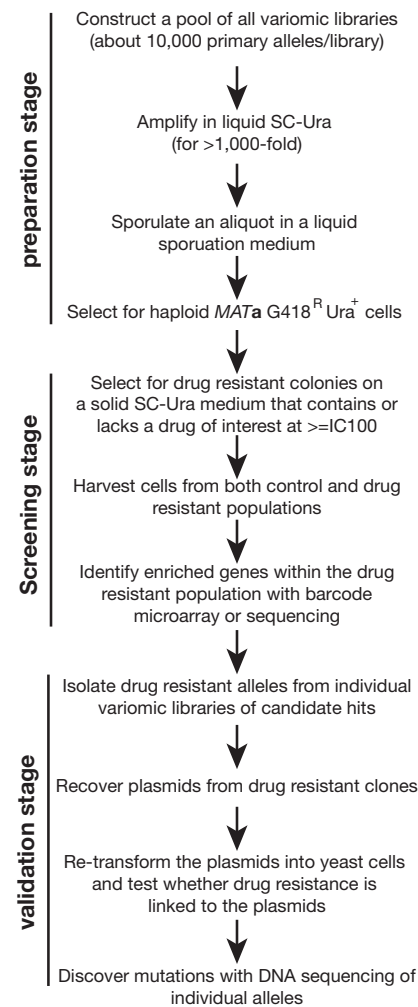

## Huang\_Fig. S3

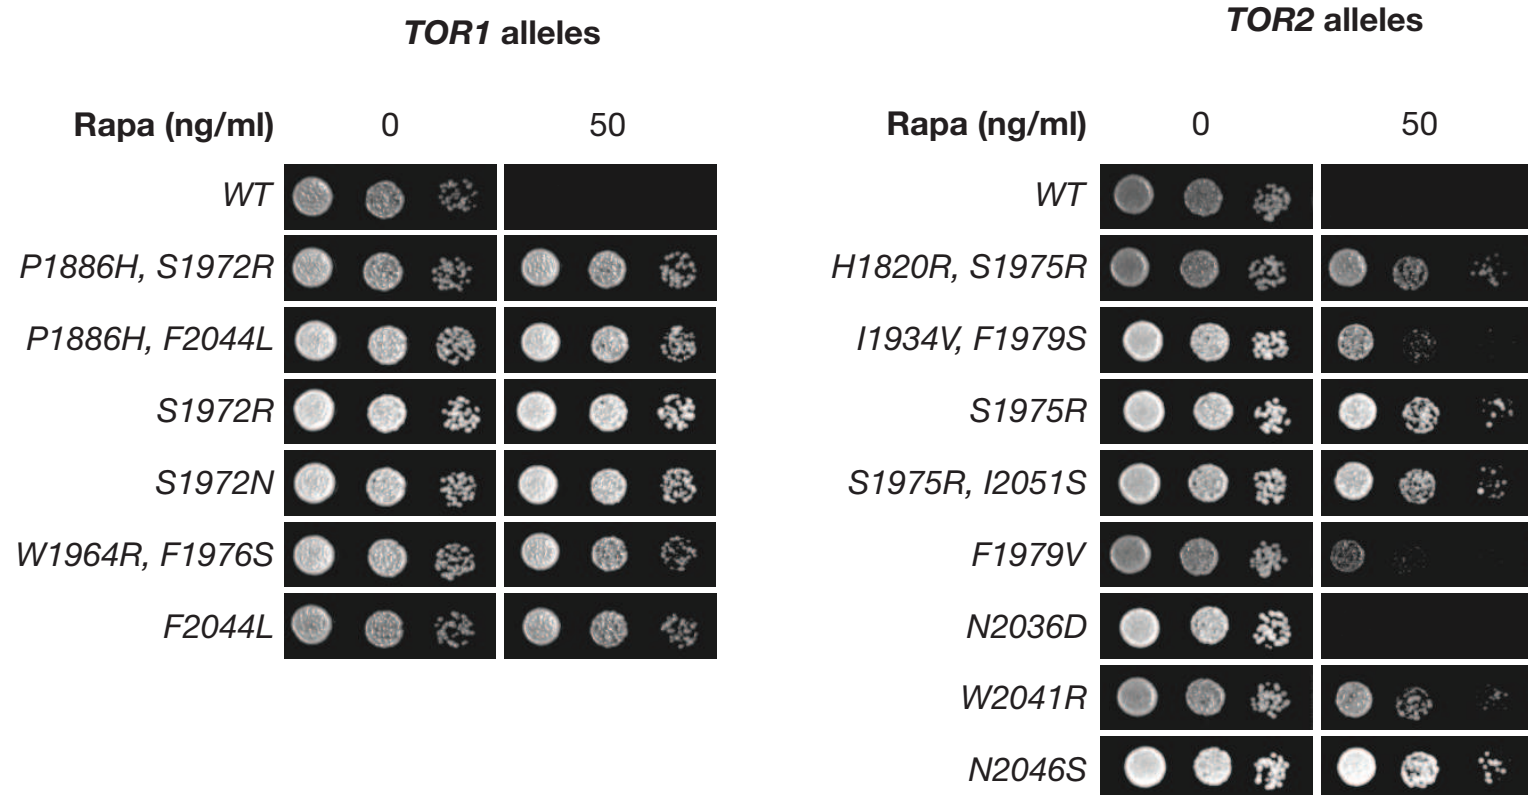

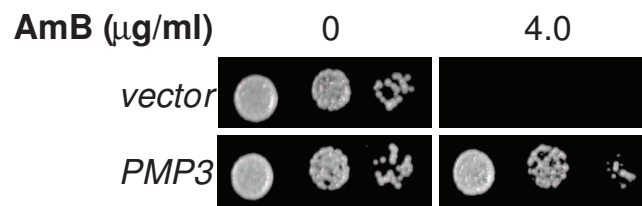

Supplement: NIHMS438068-supplement-04.pdf [file NIHMS438068-supplement-04.pdf]
